# Supplementary material
Source: PubMed Central journal article supplement (PMC4530745)
Supplement: SD4.pdf [file SD4.pdf]

SUPPLEMENTAL TABLE 1

Results of univariate ordered logistic regression assessing potential factors that may be associated with fecal contamination of water and hand-rinse samples

|                                                                             | Water samples    |                            |                  |                            |                            |                            |
|-----------------------------------------------------------------------------|------------------|----------------------------|------------------|----------------------------|----------------------------|----------------------------|
|                                                                             | Overall          |                            | IHL              |                            | Shared sanitation facility |                            |
|                                                                             | OR (95% CI)      | <i>P</i> value (Two sided) | OR (95% CI)      | <i>P</i> value (Two sided) | OR (95% CI)                | <i>P</i> value (Two sided) |
| Water source used                                                           |                  |                            |                  |                            |                            |                            |
| Piped water                                                                 | Ref              |                            | Ref              |                            | Ref                        |                            |
| Shallow tube well                                                           | 1.11 (0.64–1.93) | 0.71                       | 0.93 (0.44–1.97) | 0.85                       | 1.30 (0.57–2.97)           | 0.53                       |
| Borehole with pump                                                          | 2.23 (1.13–4.43) | 0.02                       | 0.82 (0.23–2.88) | 0.76                       | 3.93 (1.66–9.30)           | 0.002                      |
| Protected dug well                                                          | 0.36 (0.04–3.08) | 0.35                       | 0.36 (0.04–3.26) | 0.36                       | –                          | –                          |
| Unprotected dug well                                                        | 1.34 (0.30–6.1)  | 0.70                       | 2.87 (0.26–32.1) | 0.39                       | 0.74 (0.08–7.2)            | 0.79                       |
| Wealth quintile                                                             |                  |                            |                  |                            |                            |                            |
| Poorest                                                                     | Ref              |                            | Ref              |                            | Ref                        |                            |
| Middle                                                                      | 1.05 (0.70–1.59) | 0.82                       | 1.34 (0.67–2.67) | 0.41                       | 0.75 (0.43–1.30)           | 0.31                       |
| Least poor                                                                  | 0.85 (0.56–1.30) | 0.46                       | 0.75 (0.38–1.46) | 0.39                       | 0.88 (0.47–1.68)           | 0.71                       |
| Education level of the household caretaker                                  |                  |                            |                  |                            |                            |                            |
| No formal education                                                         | Ref              |                            | Ref              |                            | Ref                        |                            |
| Some/complete primary                                                       | 0.75 (0.44–1.26) | 0.28                       | 0.69 (0.29–1.64) | 0.40                       | 0.77 (0.40–1.49)           | 0.44                       |
| Some secondary                                                              | 0.55 (0.34–0.89) | 0.02                       | 0.57 (0.27–1.23) | 0.15                       | 0.49 (0.26–0.91)           | 0.02                       |
| Secondary and higher                                                        | 0.51 (0.27–0.95) | 0.04                       | 0.44 (0.18–1.08) | 0.07                       | 0.51 (0.19–1.40)           | 0.19                       |
| No. of people living in the household                                       | 1.01 (0.95–1.09) | 0.69                       | 0.97 (0.89–1.06) | 0.53                       | 1.07 (0.95–1.20)           | 0.29                       |
| No. of children < 5 years in the household                                  | 1.17 (0.87–1.56) | 0.30                       | 1.11 (0.75–1.63) | 0.61                       | 1.24 (0.80–1.92)           | 0.33                       |
| Location of water source                                                    |                  |                            |                  |                            |                            |                            |
| In own dwelling                                                             | Ref              |                            | Ref              |                            | Ref                        |                            |
| In own yard                                                                 | 0.88 (0.57–1.36) | 0.55                       | 0.94 (0.54–1.66) | 0.84                       | 0.74 (0.37–1.51)           | 0.41                       |
| Outside                                                                     | 1.28 (0.84–1.94) | 0.25                       | 1.46 (0.77–2.78) | 0.25                       | 1.34 (0.75–2.42)           | 0.33                       |
| Time to collect water (return journey, continuous variable)                 | 1.04 (0.98–1.11) | 0.17                       | 0.98 (0.86–1.11) | 0.75                       | 1.06 (0.98–1.14)           | 0.16                       |
| Feces visible in courtyard                                                  | 1.08 (0.65–1.79) | 0.77                       | 0.68 (0.29–1.56) | 0.36                       | 1.54 (0.81–2.95)           | 0.19                       |
| Facility shared                                                             | 0.77 (0.55–1.08) | 0.13                       | –                | –                          | –                          | –                          |
| Presence of at least one individual in household practicing open defecation | 1.34 (0.78–2.28) | 0.29                       | 0.97 (0.38–2.46) | 0.95                       | 1.71 (0.88–3.32)           | 0.11                       |
| House structure                                                             |                  |                            |                  |                            |                            |                            |
| Cement wall and roof (pucca)                                                | Ref              |                            | Ref              |                            | Ref                        |                            |
| Cement wall (semi-pucca)                                                    | 1.26 (0.87–1.82) | 0.22                       | 1.42 (0.86–2.35) | 0.17                       | 1.30 (0.74–2.27)           | 0.37                       |
| No cement (kucha)                                                           | 1.37 (0.75–2.51) | 0.3                        | 1.10 (0.40–3.03) | 0.85                       | 1.77 (0.80–3.93)           | 0.16                       |
|                                                                             |                  |                            |                  |                            |                            |                            |
|                                                                             | Hand rinse       |                            |                  |                            |                            |                            |
|                                                                             | Overall          |                            | IHL              |                            | Shared sanitation facility |                            |
|                                                                             | OR (95% CI)      | <i>P</i> value (Two sided) | OR (95% CI)      | <i>P</i> value (Two sided) | OR (95% CI)                | <i>P</i> value (Two sided) |
| Water source used                                                           |                  |                            |                  |                            |                            |                            |
| Piped water                                                                 | Ref              |                            | Ref              |                            | Ref                        |                            |
| Shallow tube well                                                           | 1.06 (0.60–1.86) | 0.84                       | 0.97 (0.46–2.08) | 0.95                       | 1.13 (0.48–2.63)           | 0.78                       |
| Borehole with pump                                                          | 1.50 (0.76–2.95) | 0.24                       | 0.85 (0.25–2.92) | 0.80                       | 2.08 (0.91–4.78)           | 0.08                       |
| Protected dug well                                                          | 1.97 (0.39–9.86) | 0.41                       | 2.56 (0.42–15.6) | 0.31                       | –                          | –                          |
| Unprotected dug well                                                        | 4.92 (0.94–25.6) | 0.06                       | 3.41 (0.30–38.2) | 0.32                       | 6.78 (0.69–66.2)           | 0.1                        |
| Wealth quintile                                                             |                  |                            |                  |                            |                            |                            |
| Poorest                                                                     | Ref              |                            | Ref              |                            | Ref                        |                            |
| Middle                                                                      | 0.59 (0.39–0.90) | 0.01                       | 0.61 (0.30–1.22) | 0.16                       | 0.49 (0.28–0.87)           | 0.02                       |
| Least poor                                                                  | 0.73 (0.48–1.11) | 0.14                       | 0.61 (0.32–1.18) | 0.14                       | 0.73 (0.38–1.38)           | 0.33                       |
| Education level of household caretaker                                      |                  |                            |                  |                            |                            |                            |
| No formal education                                                         | Ref              |                            | Ref              |                            | Ref                        |                            |
| Some/complete primary                                                       | 0.66 (0.38–1.12) | 0.12                       | 1.19 (0.50–2.84) | 0.70                       | 0.43 (0.22–0.87)           | 0.02                       |
| Some secondary                                                              | 0.63 (0.39–1.02) | 0.06                       | 0.78 (0.36–1.69) | 0.53                       | 0.55 (0.29–1.02)           | 0.06                       |
| Secondary and higher                                                        | 0.81 (0.44–1.49) | 0.49                       | 0.84 (0.35–2.05) | 0.71                       | 0.89 (0.34–2.29)           | 0.8                        |
| No. of people living in the household                                       | 0.97 (0.90–1.04) | 0.41                       | 0.95 (0.86–1.04) | 0.29                       | 0.98 (0.87–1.11)           | 0.79                       |
| No. of children < 5 years in the household                                  | 1.00 (0.74–1.33) | 0.97                       | 1.03 (0.70–1.52) | 0.88                       | 0.95 (0.60–1.49)           | 0.82                       |
| Location of water source                                                    |                  |                            |                  |                            |                            |                            |
| In own dwelling                                                             | Ref              |                            | Ref              |                            | Ref                        |                            |
| In own yard                                                                 | 1.19 (0.76–1.85) | 0.44                       | 1.08 (0.61–1.91) | 0.78                       | 1.32 (0.66–2.67)           | 0.43                       |
| Outside                                                                     | 1.26 (0.82–1.93) | 0.30                       | 1.19 (0.62–2.29) | 0.60                       | 1.51 (0.82–2.78)           | 0.19                       |
| Time to collect water (return journey, continuous variable)                 | 1.00 (0.95–1.04) | 0.94                       | 0.97 (0.85–1.10) | 0.66                       | 1.00 (0.95–1.05)           | 0.99                       |
| Feces visible in courtyard                                                  | 0.80 (0.47–1.36) | 0.41                       | 0.80 (0.35–1.84) | 0.60                       | 0.83 (0.41–1.66)           | 0.59                       |
| Facility shared                                                             | 0.82 (0.58–1.16) | 0.26                       | –                | –                          | –                          | –                          |
| Presence of at least one individual in household practicing open defecation | 1.10 (0.63–1.89) | 0.74                       | 0.88 (0.34–2.29) | 0.80                       | 1.30 (0.66–2.56)           | 0.45                       |
| House structure                                                             |                  |                            |                  |                            |                            |                            |
| Cement wall and roof (pucca)                                                | Ref              |                            | Ref              |                            | Ref                        |                            |
| Cement wall (semi-pucca)                                                    | 0.90 (0.62–1.30) | 0.58                       | 1.00 (0.60–1.66) | 0.99                       | 0.85 (0.49–1.46)           | 0.55                       |
| No cement (kucha)                                                           | 1.36 (0.75–2.48) | 0.31                       | 2.23 (0.83–6.05) | 0.11                       | 1.09 (0.49–2.41)           | 0.83                       |

IHL = individual household latrine.

Binary outcome coded as absence of coliforms = 0 and presence of coliforms = 1.
